# Supplementary material for: Glycogen Metabolism in Candida albicans Impacts Fitness and Virulence during Vulvovaginal and Invasive Candidiasis
Source: PubMed Central journal article supplement (PMC10127583; doi:10.1128/mbio.00046-23), 2023-02-22
Supplement: mbio.00046-23-s0005.pdf [file mbio.00046-23-s0005.pdf]

| Species                | Strain names used           | Parent              | Genotype                                                                                  | Reference  |
|------------------------|-----------------------------|---------------------|-------------------------------------------------------------------------------------------|------------|
| <i>C. parapsilosis</i> | CDC317                      | N/A                 | Wild type, reference isolate                                                              | (1)        |
| <i>C. glabrata</i>     | CBS138                      | N/A                 | Wild type, reference isolate                                                              | (1)        |
| <i>C. krusei</i>       | 4172                        | N/A                 | Wild type, reference isolate                                                              | (1)        |
| <i>C. tropicalis</i>   | MYA3404                     | N/A                 | Wild type, reference isolate                                                              | (1)        |
| <i>C. dubliniensis</i> | CD36                        | N/A                 | Wild type, reference isolate                                                              | (1)        |
| <i>C. auris</i>        | [429]0382                   | N/A                 | Wild type, reference isolate                                                              | (1)        |
| <i>C. albicans</i>     | SC5314                      | N/A                 | Wild type, reference isolate                                                              | (2)        |
| <i>C. albicans</i>     | BWP17                       | SC5314              | <i>arg4Δ/Δ his1Δ/Δ ura3Δ/Δ</i>                                                            | (3)        |
| <i>C. albicans</i>     | GP-1                        | BWP17               | <i>arg4Δ/Δ::ARG4 his1Δ/Δ::HIS1 ura3Δ/Δ::URA3</i>                                          | (4)        |
| <i>C. albicans</i>     | <i>gph1Δ/Δ</i>              | BWP17               | <i>gph1Δ::ARG4/gph1Δ::HIS1 ura3Δ/Δ::URA3</i>                                              | this study |
| <i>C. albicans</i>     | <i>gph1Δ/Δ+GPH1</i>         | <i>gph1Δ/Δ</i>      | <i>gph1Δ::ARG4/gph1Δ::HIS1 ura3Δ/Δ::URA3-GPH1</i>                                         | this study |
| <i>C. albicans</i>     | <i>gdb1Δ/Δ</i>              | GP-1                | <i>Δgdb1::FRT+/Δgdb1::FRT+</i>                                                            | this study |
| <i>C. albicans</i>     | <i>gdb1Δ/Δ+GDB1</i>         | <i>gdb1Δ/Δ</i>      | <i>Δgdb1::FRT+/Δgdb1::FRT+ NEUT5Δ::NAT1-PrGDB1-GDB1-tADH1/NEUT5</i>                       | this study |
| <i>C. albicans</i>     | <i>sga1Δ/Δ</i>              | BWP17               | <i>sga1Δ::ARG4/sga1Δ::HIS1 ura3Δ/Δ::URA3</i>                                              | this study |
| <i>C. albicans</i>     | <i>sga1Δ/Δ+SGA1</i>         | <i>sga1Δ/Δ</i>      | <i>sga1Δ::ARG4/sga1Δ::HIS1 ura3Δ/Δ::URA3-SGA1</i>                                         | this study |
| <i>C. albicans</i>     | <i>glg1Δ/Δ</i>              | BWP17               | <i>glg1Δ::ARG4/glg1Δ::HIS1 ura3Δ/Δ::URA3</i>                                              | this study |
| <i>C. albicans</i>     | <i>glg1Δ/Δ+GLG1</i>         | <i>glg1Δ/Δ</i>      | <i>glg1Δ::ARG4/glg1Δ::HIS1 ura3Δ/Δ::URA3-GLG1</i>                                         | this study |
| <i>C. albicans</i>     | <i>glg2Δ/Δ</i>              | BWP17               | <i>glg2Δ::ARG4/glg2Δ::HIS1 ura3Δ/Δ::URA3</i>                                              | this study |
| <i>C. albicans</i>     | <i>glg2Δ/Δ+GLG2</i>         | <i>glg2Δ/Δ</i>      | <i>glg2Δ::ARG4/glg2Δ::HIS1 ura3Δ/Δ::URA3-GLG2</i>                                         | this study |
| <i>C. albicans</i>     | <i>gsy1Δ/Δ</i>              | BWP17               | <i>gsy1Δ::ARG4/gsy1Δ::HIS1 ura3Δ/Δ::URA3</i>                                              | this study |
| <i>C. albicans</i>     | <i>gsy1Δ/Δ+GSY1</i>         | <i>gsy1Δ/Δ</i>      | <i>gsy1Δ::ARG4/gsy1Δ::HIS1 ura3Δ/Δ::URA3-GSY1</i>                                         | this study |
| <i>C. albicans</i>     | <i>glc3Δ/Δ</i>              | BWP17               | <i>glc3Δ::ARG4/glc3Δ::HIS1 ura3Δ/Δ::URA3</i>                                              | this study |
| <i>C. albicans</i>     | <i>glc3Δ/Δ+GLC3</i>         | <i>glc3Δ/Δ</i>      | <i>glc3Δ::ARG4/glc3Δ::HIS1 ura3Δ/Δ::URA3-GLC3</i>                                         | this study |
| <i>C. albicans</i>     | <i>gph1Δ/Δ sga1Δ/Δ</i>      | <i>gph1Δ/Δ</i>      | <i>gph1Δ::ARG4/gph1Δ::HIS1 ura3Δ/Δ::URA3 sga1Δ::FRT+/sga1Δ::FRT+</i>                      | this study |
| <i>C. albicans</i>     | <i>gph1Δ/Δ sga1Δ/Δ+GPH1</i> | <i>gph1Δ/Δ+GPH1</i> | <i>gph1Δ::ARG4/gph1Δ::HIS1 ura3Δ/Δ::URA3-GPH1 sga1Δ::FRT+/sga1Δ::FRT+</i>                 | this study |
| <i>C. albicans</i>     | <i>gph1Δ/Δ sga1Δ/Δ+SGA1</i> | <i>sga1Δ/Δ+SGA1</i> | <i>sga1Δ::ARG4/sga1Δ::HIS1 ura3Δ/Δ::URA3-SGA1 gph1Δ::FRT+/gph1Δ::FRT+</i>                 | this study |
| <i>C. albicans</i>     | GP1-GFPy                    | GP-1                | <i>NEUT5Δ::PrTEF1-GFPy-tADH1/NEUT5</i>                                                    | this study |
| <i>C. albicans</i>     | <i>gph1Δ/Δ-dTomato</i>      | <i>gph1Δ/Δ</i>      | <i>gph1Δ::ARG4/gph1Δ::HIS1 ura3Δ/Δ::URA3 NEUT5Δ::NAT1-PrTEF1-dTomato-tADH1/NEUT5</i>      | this study |
| <i>C. albicans</i>     | <i>gph1Δ/Δ+GPH1-dTomato</i> | <i>gph1Δ/Δ+GPH1</i> | <i>gph1Δ::ARG4/gph1Δ::HIS1 ura3Δ/Δ::URA3-GPH1 NEUT5Δ::NAT1-PrTEF1-dTomato-tADH1/NEUT5</i> | this study |
| <i>C. albicans</i>     | <i>gdb1Δ/Δ-dTomato</i>      | <i>gdb1Δ/Δ</i>      | <i>Δgdb1::FRT+/Δgdb1::FRT+ NEUT5Δ::NAT1-PrTEF1-dTomato-tADH1/NEUT5</i>                    | this study |
| <i>C. albicans</i>     | <i>sga1Δ/Δ-dTomato</i>      | <i>sga1Δ/Δ</i>      | <i>sga11Δ::ARG4/sga11Δ::HIS1 ura3Δ/Δ::URA3 NEUT5Δ::NAT1-PrTEF1-dTomato-tADH1/NEUT5</i>    | this study |
| <i>C. albicans</i>     | <i>sga1Δ/Δ+SGA1-dTomato</i> | <i>sga1Δ/Δ+SGA1</i> | <i>sga1Δ::ARG4/sga1Δ::HIS1 ura3Δ/Δ::URA3-SGA1 NEUT5Δ::NAT1-PrTEF1-dTomato-tADH1/NEUT5</i> | this study |
| <i>C. albicans</i>     | <i>gsy1Δ/Δ-dTomato</i>      | <i>gsy1Δ/Δ</i>      | <i>gsy1Δ::ARG4/gsy1Δ::HIS1 ura3Δ/Δ::URA3 NEUT5Δ::NAT1-PrTEF1-dTomato-tADH1/NEUT5</i>      | this study |

|                    |                                      |                              |                                                                                                                   |            |
|--------------------|--------------------------------------|------------------------------|-------------------------------------------------------------------------------------------------------------------|------------|
| <i>C. albicans</i> | <i>gsy1Δ/Δ</i> +GSY1-dTomato         | <i>gsy1Δ/Δ</i> +GSY1         | <i>gsy1Δ::ARG4/gsy1Δ::HIS1 ura3Δ/Δ::URA3-GSY1 NEUT5Δ::NAT1-PrTEF1-dTomato-tADH1/NEUT5</i>                         | this study |
| <i>C. albicans</i> | <i>glc3Δ/Δ</i> -dTomato              | <i>glc3Δ/Δ</i>               | <i>glc3Δ::ARG4/glc3Δ::HIS1 ura3Δ/Δ::URA3 NEUT5Δ::NAT1-PrTEF1-dTomato-tADH1/NEUT5</i>                              | this study |
| <i>C. albicans</i> | <i>glc3Δ/Δ</i> +GLC3-dTomato         | <i>glc3Δ/Δ</i> +GLC3         | <i>glc3Δ::ARG4/glc3Δ::HIS1 ura3Δ/Δ::URA3-GLC3 NEUT5Δ::NAT1-PrTEF1-dTomato-tADH1/NEUT5</i>                         | this study |
| <i>C. albicans</i> | <i>gph1Δ/Δ sga1Δ/Δ</i> -dTomato      | <i>gph1Δ/Δ sga1Δ/Δ</i>       | <i>gph1Δ::ARG4/gph1Δ::HIS1 ura3Δ/Δ::URA3 sga1Δ::FRT+/sga1Δ::FRT NEUT5Δ::NAT1-PrTEF1-dTomato-tADH1/NEUT5</i>       | this study |
| <i>C. albicans</i> | <i>gph1Δ/Δ sga1Δ/Δ</i> +GPH1-dTomato | <i>gph1Δ/Δ sga1Δ/Δ</i> +GPH1 | <i>gph1Δ::ARG4/gph1Δ::HIS1 ura3Δ/Δ::URA3-GPH1 sga1Δ::FRT+/sga1Δ::FRT+ NEUT5Δ::NAT1-PrTEF1-dTomato-tADH1/NEUT5</i> | this study |
| <i>C. albicans</i> | <i>gph1Δ/Δ sga1Δ/Δ</i> +SGA1-dTomato | <i>gph1Δ/Δ sga1Δ/Δ</i> +SGA1 | <i>sga1Δ::ARG4/sga1Δ::HIS1 ura3Δ/Δ::URA3-SGA1 gph1Δ::FRT+/gph1Δ::FRT+ NEUT5Δ::NAT1-PrTEF1-dTomato-tADH1/NEUT5</i> | this study |

## References

1. Willems HME, Lowes DJ, Barker KS, Palmer GE, Peters BM. 2018. Infect Immun 86:e00527-18.
2. Gillum AM, Tsay EY, Kirsch DR. 1984. Mol Gen Genet 198:179-82.
3. Wilson RB, Davis D, Mitchell AP. 1999. J Bacteriol 181:1868-74.
4. Willems HME, Bruner WS, Barker KS, Liu J, Palmer GE, Peters BM. 2017. Infect Immun 85:e00248-17.
