# Supplementary material for: Glycogen Metabolism in Candida albicans Impacts Fitness and Virulence during Vulvovaginal and Invasive Candidiasis
Source: PubMed Central journal article supplement (PMC10127583; doi:10.1128/mbio.00046-23), 2023-02-22
Supplement: mbio.00046-23-s0006.pdf [file mbio.00046-23-s0006.pdf]

| <b>Vector</b> | <b>Reference</b> |
|---------------|------------------|
| pLUX          | (1)              |
| pLUX-GPH1     | this study       |
| pLUX-SGA1     | this study       |
| pLUX-GLG1     | this study       |
| pLUX-GLG2     | this study       |
| pLUX-GSY1     | this study       |
| pLUX-GLC3     | this study       |
| pDUP3         | (2)              |
| pDUP3-GFPy    | this study       |
| pDUP3-dTomato | this study       |
| pDUP3-tADH1   | (3)              |
| pKE4-GFPy     | (4)              |
| pKE4-dTomato  | (4)              |

## References

1. Goshorn AK, Grindle SM, Scherer S. 1992. *Infect Immun* 60:876-84.
2. Gerami-Nejad M, Zacchi LF, McClellan M, Matter K, Berman J. 2013. *Microbiology (Reading)* 159:565-579.
3. Liu J, Vogel AK, Miao J, Carnahan JA, Lowes DJ, Rybak JM, Peters BM. 2022. *Microbiol Spectr* 10:e0263021.
4. Butts A, DeJarnette C, Peters TL, Parker JE, Kerns ME, Eberle KE, Kelly SL, Palmer GE. 2017. *mSphere* 2:e00379-17.
