# Supplementary material for: Glycogen Metabolism in Candida albicans Impacts Fitness and Virulence during Vulvovaginal and Invasive Candidiasis
Source: PubMed Central journal article supplement (PMC10127583; doi:10.1128/mbio.00046-23), 2023-02-22
Supplement: mbio.00046-23-s0007.pdf [file mbio.00046-23-s0007.pdf]

| Primer or RNA name | Sequence (5' to 3') <sup>a</sup>                                                       |
|--------------------|----------------------------------------------------------------------------------------|
| GPH1_AmpF-KpnI     | TCAG <b>GGTACC</b> GGGAAGGTTAGTGGGGAGAGAGAAAT                                          |
| GPH1_AmpR-SacI     | TCAG <b>GAGCTC</b> CTTTCTCTCCCTTCATTGCCGAG                                             |
| GPH1_DISF          | ATTATTTTTCAGGTAACGTTTTTATACAGTTATAGATCTAATTAATTAATTGATAGTGTTGTGATCGTTTCCCAGTCACGACGTT  |
| GPH1_DISR          | TAGCTAAGAATTA AAAAGTGGTAAAACACAACAACAAAAGATCTTTCAAAAAATTTCAAGGACCATGTGGAATTGTGAGCGGATA |
| GPH1_DETF          | GGGTTGCTGCTTCCTTGCATGATA                                                               |
| GPH1_DETR          | GCTTGTCTCAACCAACGTCTTGG                                                                |
| GPH1_seq1          | GACCAACCGACAACAACAACACTTTTTATT                                                         |
| GPH1_seq2          | CAGAACCTGGACAAATGATTCTGCTTTAG                                                          |
| GPH1_seq3          | GACCGATTTTGGACTCTCTTCAATGATAGA                                                         |
| GPH1_seq4          | AACCGTAAAAGTCAACTGGGATTTGAATTT                                                         |
| GPH1_CC9KO-F       | AGATATGCAGACGTACATTGCCCCCTAATTTCTTCTATAGGTTTTCCCAGTCACGACGT                            |
| GPH1_CC9KO-R       | CTTTTTTTTTTCTATTTTTCCCGCGAGTTTTGTTTATCTGTGTGGAATTGTGAGCGGAT                            |
| GDB1_CC9KO-F       | TCCGCTTAAATTGGAACGGGGACAAAAGACAATGACGAGGTTTTCCCAGTCACGACGT                             |
| GDB1_CC9KO-R       | TATTTTAAATTGTTAGGAATTCCTGTTTGGACTATTGGCAGTGTGGAATTGTGAGCGGAT                           |
| crGPH1_up          | CCGGAAATGTTGAACTTGCT                                                                   |
| crGPH1_down        | ATATTCGAATCAAGTTCGGA                                                                   |
| crGDB1_up          | ACACGACGACGTTTACCGAG                                                                   |
| crGDB1_down        | TATACGACGTTGACGTAAAG                                                                   |
| GDB1_AmpF-KpnI     | TCAG <b>GGTACC</b> GTGGAGGGCTGTTGTAAAGTCTT                                             |
| GDB1_AmpR-SacI     | TCAG <b>GAGCTC</b> GCTTCCCAATCCACAATCTACACAC                                           |
| GDB1_DETF          | TGAAATGCCAGCACAAAAGCGAACT                                                              |
| GDB1_DETR          | GATCCAGGAATGAACGAGGCTTCAT                                                              |
| PrGDB1_INTR        | ACTCATGGATCAGCCATCATCAAGC                                                              |
| PrGDB1_OL-F        | CCTCGAGGTCGACGGTATCGGTGGAGGGCTGTTGTAAAGTCTTG                                           |
| GDB1_OL-R          | ATTTGCTTAGCATGCACGCGCTAAATCTGTCTGAACAATCTAAATATCTATATAG                                |
| GDB1_seq1          | GGATCTACTGTATACAGTACGAAGCACTGG                                                         |
| GDB1_seq2          | GGGACTTTATACACTAATGTGCCCTCAAAG                                                         |
| GDB1_seq3          | GACGGTATTCAAACCTCACGTGTTGGATAA                                                         |
| GDB1_seq4          | AATTGTCTGCCAAGACTTTCAATGGGTTTA                                                         |
| GDB1_seq5          | AGATATAATGCAAGAACAGGTAACGGTTGG                                                         |
| GDB1_seq6          | CTTATTATGGGTATTGCTTATGAAGCAGCC                                                         |
| GDB1_seq7          | GGTGGTAATCAATTCAATTGTGGTACTTGG                                                         |
| GDB1_seq8          | GACCAGAATGGGTTTGAATACTGGATATT                                                          |
| SGA1_AmpF-KpnI     | TCAG <b>GGTACC</b> GCTGTTGCATGTTGTCAACTTGAAT                                           |

|                |                                                                                       |
|----------------|---------------------------------------------------------------------------------------|
| SGA1_AmpR-SacI | TCAGAGCTCTATGGGATCCCTTATCACGTGCCAC                                                    |
| SGA1_DISF      | ATCGTTATACCTTCCTATAGATTAGACTTTTTATTACATTTTATTTTAGAACTTCACACTAAGTCGTTTTCCCAGTCACGACGTT |
| SGA1_DISR      | CAGTATTCAATTGTTTTAAAAAACACTATACAAAATTAATCAATAAAAAACAACAAAGCTAATTTGTGGAATTGTGAGCGGATA  |
| SGA1_DETF      | AGCATCACCGTCAACTTCAAATCCT                                                             |
| SGA1_DETR      | CAGGGTATCGACCTAATGCTACTCC                                                             |
| SGA1_seq1      | ATCACGTGCCACTTATTCTTTCATTTAACG                                                        |
| SGA1_seq2      | TATCTTCAGGGTATCGACCTAATGCTACTC                                                        |
| SGA1_seq3      | GGTTCACCTAAATTTTCCAAGTTGTCAACA                                                        |
| crSGA1-up      | GTTGCTGTGGATAGTAGAGA                                                                  |
| crSGA1-down    | TGAGTTATTAGATCGCTCAG                                                                  |
| SGA1_CC9KO-F   | TATACATTGTCATTAATGGAGTAACTAGTTGATTGGTTACGGTTTTCCCAGTCACGACGT                          |
| SGA1_CC9KO-R   | AAGAAGACGAGAAAAATATTGTTATCTGATCAAGAAATTGAGTGTGGAATTGTGAGCGGAT                         |
| SGA1_AmpR-v2   | ATGGACAAACCAGTCAAGATTCAAGC                                                            |
| GLG1_AmpF-StuI | TCAAGGCCTAATACGCTCCCACTGCAGCTTATAT                                                    |
| GLG1_AmpR-SacI | TCAGAGCTCAGTTCGTAGAGTGAAAGTGACACAGA                                                   |
| GLG1_DISF      | ATCCATTTATCCCACAGTTTTCCAGAAAAAATACACACACATATCTATAACAATAAGTATCTCCGGTTTTCCCAGTCACGACGTT |
| GLG1_DISR      | TAAGGTAATTACTACGGAAATCTTTTCTGATATCTTCTTTCATATACTATTGATTCTTATGAATTTGTGGAATTGTGAGCGGATA |
| GLG1_DETF      | GGATCAGAGGTATCAAGTGGTGGTT                                                             |
| GLG1_DETR      | ACTTATGATTTGAAGAGACCGGAATTGGAC                                                        |
| GLG1_seq1      | TGTTTCATTTCTCCCCTGTGCTTGT                                                             |
| GLG1_seq2      | ACCCTAATGTATCTTTTGATGGTGCTGATC                                                        |
| GLG1_seq3      | AATCAACCTAGCATCGATGCCATG                                                              |
| GLG2_AmpF-KpnI | TCAGGTACCACAAGCTCGCAAAATAGTTTTGTCC                                                    |
| GLG2_AmpR-SacI | TCAGAGCTCGAACAACCAAATCAATGCCAGGTC                                                     |
| GLG2_DISF      | ACAAATCTATAACAACACTACATCTCCACTACTTCTTTTTCTACTTATATATTATTACAATCAGGTTTCCCAGTCACGACGTT   |
| GLG2_DISR      | TCTTTCAAATCATTCTTAAGCCATAATTTTATTCCAAAGAAAACTAGTGGCATTCTGTCAACTGTGGAATTGTGAGCGGATA    |
| GLG2_DETF      | TTGGTGCTGCTTCTGATTCTGGATG                                                             |
| GLG2_DETR      | TTGAAAACACGAGTAGGCTGTCTT                                                              |
| GLG2_seq1      | TAATCAAATCAAGTTCACCTTCAACCTCGC                                                        |
| GLG2_seq2      | TGGAGGCGATCAAGGATTGTTAATGAATA                                                         |
| GSY1_AmpF-KpnI | TCAGGTACCATGACCCAATGTTGGCTTTATTAGT                                                    |
| GSY1_AmpR-SacI | TCAGAGCTCAGAAAAGCGTTAAGAACCATTCAAGTC                                                  |
| GSY1_DISF      | TCGTTTTGTTTCATTTTCCCACCGTCCCCCTTTAGTTTTTGTCCACATTTAATTTAGAAGAACAGTTTCCCAGTCACGACGTT   |
| GSY1_DISR      | GTAAGAAACCTATACATATGTATATAATTTATAACAAGCATATAATATTGGGCAAAAATTAAGTTGTGGAATTGTGAGCGGATA  |
| GSY1_DETF      | TACCCCTGATCATGACCTGGAAACC                                                             |
| GSY1_DETR      | AGGTTTCGTAGTAGGATGGGAACACA                                                            |

|                    |                                                                                     |
|--------------------|-------------------------------------------------------------------------------------|
| GSY1_seq1          | CTCTGACTTGAGATTGCCTAATTAGTCACC                                                      |
| GSY1_seq2          | TTCAAGACTGGATCAGTACTGTCATCAACC                                                      |
| GSY1_seq3          | CCAGCACACAAGTATCTTCCCAATAATGTT                                                      |
| GLC3_AmpF-AvrII    | TCAC <b><u>CTAG</u></b> GGGCTGGTGATGTTGATGTTGTTGTT                                  |
| GLC3_AmpR-SacI     | TCAG <b><u>GAGCTC</u></b> GTTAATCAAATCTTGATTGCGCCGC                                 |
| GLC3_DISF          | ATCGTTATACCTTCCTATAGATTAGACTTTTTATTACATTTTATTTTAGAAGCTTCACTAAGTCGTTTTCCAGTCACGACGTT |
| GLC3_DISR          | CAGTATTCAATTGTTTTAAAAAACACTATACAAAATTAATCAATAAAAAACAAGCTAATTTGTGGAATTGTGAGCGGATA    |
| GLC3_DETF          | CTACTCCGGAACCAACTATTGGTAGT                                                          |
| GLC3_DETR          | CGAGTCTTCCATGACCACCTAAATCT                                                          |
| GLC3_seq1          | GGTACCAGAGCTCGTTAATCAAATCTTGAT                                                      |
| GLC3_seq2          | ACGGATTAATTTATGAAGGGCAATACCTCT                                                      |
| GLC3_seq3          | TTAATTCATCAGGGGTACCATATCGAGATG                                                      |
| HIS1_INTF2         | ACTGTATCCTCTTCTGTCCCC                                                               |
| HIS1_INTR2         | CGACCATATGGGAGAGCTCCC                                                               |
| ARG4_INTF2         | AAGCTAGTGTGGAAAGAAGAG                                                               |
| ARG4_INTR2         | AATGACTGAATTATGTCGGTC                                                               |
| LUXINT_DETF        | CTGACCTTTAGTCTTTCCTGC                                                               |
| LUXINT_DETR        | CAGTAGTACTTGTTGTTGTATCG                                                             |
| N5ADH1_up-UNIVOL-F | CCTCGAGGTCGACGGTATCG                                                                |
| N5ADH1_up-UNIVOL-R | CGATACCGTCGACCTCGAGG                                                                |
| ADH1t-UNIV-OL-F    | CGCGTGCATGCTAAGCAAAT                                                                |
| NAT1_INTF          | CCCAGATGCGAAGTTAAGTGCG                                                              |
| NEUT5L_homology-F  | GCAGATATGAGATAAAAGTTTTAAAGGACAAGAAAAGG                                              |
| NEUT5L_homology-R  | ATCTCTAATAATTGCAATTGCAATTGCTTCACATA                                                 |
| crNEUT5pDUPup      | GTAGTAAGACAATATGACTT                                                                |
| PrTEF1-F-ClaI      | TCA <b><u>ATCGAT</u></b> GACGGCCAGTCCGTAATACGA                                      |
| tADH1-R-SpeI       | TCA <b><u>ACTAGT</u></b> GAAAACCTTGAAACTTGAAAACACCG                                 |

<sup>a</sup>Engineered restriction enzyme sites are highlighted in bold text and underlined.
